# Supplementary material for: The sound of trustworthiness: Acoustic-based modulation of perceived voice personality
Source: PubMed Central journal article supplement (PMC5638233; doi:10.1371/journal.pone.0185651), 2017-10-12
Supplement: pone.0185651.s007.pdf [file pone.0185651.s007.pdf]

|                              | Duration<br>(ms) | avgf0<br>(Hz) | minf0<br>(Hz) | maxf0<br>(Hz) | stdf0<br>(Hz) | avgF1<br>(Hz) | avgF2<br>(Hz) | avgF3<br>(Hz) | avgF4<br>(Hz) | HNR<br>(dB) | Energy<br>(a.u.) |
|------------------------------|------------------|---------------|---------------|---------------|---------------|---------------|---------------|---------------|---------------|-------------|------------------|
| Control<br>Continuum         |                  |               |               |               |               |               |               |               |               |             |                  |
| S1                           | 343              | 242           | 205           | 300           | 31,2          | 542,9         | 1358          | 2810          | 4050          | 17,8        | 20,2             |
| S2                           | 355              | 241           | 206           | 314           | 31,6          | 524,7         | 1352          | 2836          | 4111          | 19,6        | 20,9             |
| S3                           | 367              | 235           | 190           | 309           | 33,0          | 516,5         | 1328          | 2836          | 4120          | 21,4        | 22,2             |
| S4                           | 379              | 235           | 185           | 322           | 37,5          | 504,3         | 1308          | 2845          | 4175          | 22,0        | 24,5             |
| S5                           | 391              | 235           | 185           | 327           | 42,8          | 499,3         | 1290          | 2870          | 4233          | 23,7        | 25,2             |
| S6                           | 403              | 235           | 192           | 328           | 48,1          | 488,2         | 1265          | 2887          | 4212          | 23,4        | 24,7             |
| S7                           | 415              | 235           | 182           | 335           | 54,0          | 492,7         | 1243          | 2915          | 4254          | 23,5        | 23,6             |
| S8                           | 427              | 236           | 164           | 344           | 60,0          | 483,0         | 1224          | 2935          | 4238          | 21,8        | 23,4             |
| S9                           | 439              | 236           | 153           | 352           | 66,5          | 481,1         | 1203          | 2985          | 4236          | 20,8        | 23,2             |
| Trustworthiness<br>Continuum |                  |               |               |               |               |               |               |               |               |             |                  |
| S1                           | 416              | 113           | 99            | 132           | 10,2          | 489,1         | 1179          | 2788          | 4016          | 11,1        | 37,5             |
| S2                           | 411              | 118           | 105           | 131           | 8,2           | 494,3         | 1132          | 2788          | 3896          | 13,8        | 32,7             |
| S3                           | 406              | 122           | 111           | 131           | 6,5           | 488,5         | 1169          | 2774          | 3934          | 16,1        | 28,0             |
| S4                           | 401              | 126           | 115           | 135           | 5,3           | 501,0         | 1217          | 2809          | 3988          | 17,1        | 25,7             |
| S5                           | 396              | 131           | 124           | 143           | 4,8           | 472,8         | 1178          | 2739          | 3945          | 16,0        | 25,1             |
| S6                           | 391              | 136           | 129           | 148           | 5,5           | 474,2         | 1253          | 2779          | 3992          | 13,9        | 21,8             |
| S7                           | 386              | 141           | 129           | 155           | 6,9           | 470,7         | 1226          | 2747          | 3967          | 11,3        | 24,3             |
| S8                           | 381              | 146           | 129           | 161           | 9,0           | 473,0         | 1277          | 2761          | 4031          | 10,9        | 23,7             |
| S9                           | 376              | 152           | 128           | 166           | 11,4          | 484,5         | 1403          | 2816          | 4118          | 9,9         | 21,1             |
